# Supplementary material
Source: HighWire-hosted journal article supplement (https://gut.bmj.com/content/71/11/2300)
Supplement: inline-supplementary-material-2 [file inline-supplementary-material-2.pdf]

## SUPPLEMENTARY MATERIAL AND METHODS

### Fluorescent antibodies

The following fluorochrome labeled antibodies were used for surface and intracellular staining: Anti-CD107a (H4A3), anti-CD14 (M5E2), anti-CD19 (HIB19), anti-CD25 (M-A251), anti-CD3 (SK7), anti-CD4RPA-T4, anti-CD45RA (HI100), anti-CD56 (NCAM16.2), anti-CD8 (RPA-T8), anti-FoxP3 (259D/C7), anti-gdTCR (B1), anti-Granzyme B (GB11), anti-CD14 (MφP9), anti-CD19 (HIB19), anti-PD-1 (EH12.1), anti-CD14 (M5E2), anti-CD19 (SJ24C1), anti-IFN- $\gamma$  (B27) and anti-MIP-1 $\beta$  (D21-1351) from BD Biosciences; anti-CCR7 (G043H7), anti-CD11c (Bu15), anti-CD127 (A019D5), anti-CD14 (63D3), anti-CD141 (M80), anti-CD16 (5C8), anti-CD1c (L161), anti-CD3 (UCHT1), anti-CD303 (201A), anti-CD39 (A1), anti-CD8 (RPA-T8), anti-CD86 (IT2.2), anti-HLA-DR (L243), anti-HLA-DR, anti-Ki-67 (Ki-67), anti-PD-1 (EH12.2H7), anti-Tbet (4B10), anti-TCF-1 (7F11A10), anti-TCR V $\alpha$ 7.2 (3C10) and anti-TNF- $\alpha$  (Mab11) from Biolegend (San Diego, CA, USA); anti-CD154 (5C8) and anti-KLRG1 (REA261) from Miltenyi Biotec; and anti-Eomes (WD1928) from Thermo Fisher Scientific.

## SUPPLEMENTARY TABLES

**Supplementary Table 1. Overlapping peptides of HBV genotype D and amino acid sequences**

Core antigen:

| Peptide pool | Peptide number | Amino acid sequence     |
|--------------|----------------|-------------------------|
| Core pool 1  | Peptide 1      | [H]MQLFHLCLIISCS[OH]    |
|              | Peptide 2      | [H]LCLIISCSCTVQAS[OH]   |
|              | Peptide 3      | [H]SCSCTVQASKLCLG[OH]   |
|              | Peptide 4      | [H]TVQASKLCLGWLWGM[OH]  |
|              | Peptide 5      | [H]KLCLGWLWGMIDPY[OH]   |
|              | Peptide 6      | [H]WLWGMIDPYKEFGA[OH]   |
|              | Peptide 7      | [H]IDPYKEFGATVELL[OH]   |
|              | Peptide 8      | [H]KEFGATVELLSFLPS[OH]  |
|              | Peptide 9      | [H]TVELLSFLPSDFFPS[OH]  |
|              | Peptide 10     | [H]SFLPSDFFPSVRDLL[OH]  |
|              | Peptide 11     | [H]DFFPSVRDLLDTASA[OH]  |
|              | Peptide 12     | [H]VRDLLDTASALYREA[OH]  |
|              | Peptide 13     | [H]DTASALYREALESP[OH]   |
|              | Peptide 14     | [H]LYREALESPHCSPH[OH]   |
|              | Peptide 15     | [H]LESPEHCSPHHTALR[OH]  |
|              | Peptide 16     | [H]HCSPHHTALRQAILC[OH]  |
|              | Peptide 17     | [H]HTALRQAILCWGELM[OH]  |
|              | Peptide 18     | [H]QAILCWGELMTLATW[OH]  |
|              | Peptide 19     | [H]WGELMTLATWVGVL[OH]   |
|              | Peptide 20     | [H]TLATWVGVLNLEDPAS[OH] |
| Core pool 2  | Peptide 21     | [H]VGVLNLEDPASRDVV[OH]  |
|              | Peptide 22     | [H]EDPASRDVVSYVNT[OH]   |
|              | Peptide 23     | [H]RDVVSYVNTNMGLK[OH]   |
|              | Peptide 24     | [H]SYVNTNMGLKFRQLL[OH]  |
|              | Peptide 25     | [H]NMGLKFRQLLWFHIS[OH]  |
|              | Peptide 26     | [H]FRQLLWFHISCLTFG[OH]  |
|              | Peptide 27     | [H]WFHISCLTFGRETVI[OH]  |
|              | Peptide 28     | [H]CLTFGRETVIEYLV[OH]   |
|              | Peptide 29     | [H]RETVIEYLVSGVWI[OH]   |
|              | Peptide 30     | [H]EYLVSGVWIRTTPPA[OH]  |
|              | Peptide 31     | [H]FGVWIRTTPPAYRPPN[OH] |
|              | Peptide 32     | [H]RTTPPAYRPPNAPILS[OH] |
|              | Peptide 33     | [H]YRPPNAPILSTLPET[OH]  |

|  |            |                        |
|--|------------|------------------------|
|  | Peptide 34 | [H]APILSTLPETTIVRR[OH] |
|  | Peptide 35 | [H]TLPETTIVRRRGRSP[OH] |
|  | Peptide 36 | [H]TVVRRRGRSPRRRTP[OH] |
|  | Peptide 37 | [H]RGRSPRRRTPSPRRR[OH] |
|  | Peptide 38 | [H]RRRTPSPRRRRSQSP[OH] |
|  | Peptide 39 | [H]SPRRRRSQSPRRRRS[OH] |
|  | Peptide 40 | [H]RSQSPRRRRSQSREP[OH] |
|  | Peptide 41 | [H]QSPRRRRSQSREPQC[OH] |

Surface antigen:

| Peptide pool   | Peptide number | Amino acid sequence    |
|----------------|----------------|------------------------|
| Surface pool 1 | Peptide 1      | [H]MGQNLSTSNPLGFFP[OH] |
|                | Peptide 2      | [H]STSNPLGFFPDHQLD[OH] |
|                | Peptide 3      | [H]LGFFPDHQLDPAFRA[OH] |
|                | Peptide 4      | [H]DHQLDPAFRANTANP[OH] |
|                | Peptide 5      | [H]PAFRANTANPDWDFN[OH] |
|                | Peptide 6      | [H]NTANPDWDFNPNKDT[OH] |
|                | Peptide 7      | [H]DWDFNPNKDTWPDAN[OH] |
|                | Peptide 8      | [H]PNKDTWPDANKVGAG[OH] |
|                | Peptide 9      | [H]WPDANKVGAGAFGLG[OH] |
|                | Peptide 10     | [H]KVGAGAFGLGFTPPH[OH] |
|                | Peptide 11     | [H]AFGLGFTPPHGGLLG[OH] |
|                | Peptide 12     | [H]FTPPHGGLLGWSPQA[OH] |
|                | Peptide 13     | [H]GGLLGWSPQAQGILQ[OH] |
|                | Peptide 14     | [H]WSPQAQGILQTLPAN[OH] |
|                | Peptide 15     | [H]QGILQTLPANPPPAS[OH] |
|                | Peptide 16     | [H]TLPANPPPASTNRQT[OH] |
|                | Peptide 17     | [H]PPPASTNRQTGRQPT[OH] |
|                | Peptide 18     | [H]TNRQTGRQPTPLSPP[OH] |
|                | Peptide 19     | [H]GRQPTPLSPPLRNTH[OH] |
| Surface pool 2 | Peptide20      | [H]PLSPPLRNTHPQAMQ[OH] |
|                | Peptide21      | [H]LRNTHPQAMQWNSTT[OH] |
|                | Peptide22      | [H]PQAMQWNSTTFHQT[OH]  |
|                | Peptide23      | [H]WNSTTFHQTLDPRV[OH]  |
|                | Peptide24      | [H]FHQTLDPRVRGLYF[OH]  |
|                | Peptide25      | [H]QDPRVRGLYFPAGGS[OH] |
|                | Peptide26      | [H]RGLYFPAGGSSSGAV[OH] |
|                | Peptide27      | [H]PAGGSSSGAVNPVPT[OH] |
|                | Peptide28      | [H]SSGAVNPVPTTASPL[OH] |
|                | Peptide29      | [H]NPVPTTASPLSSIFS[OH] |

|                |            |                          |
|----------------|------------|--------------------------|
|                | Peptide30  | [H]TASPLSSIFSRIGDP[OH]   |
|                | Peptide31  | [H]SSIFSRIGDPALNME[OH]   |
|                | Peptide32  | [H]RIGDPALNMENITSG[OH]   |
|                | Peptide33  | [H]ALNMENITSGFLGPL[OH]   |
|                | Peptide34  | [H]NITSGFLGPLLVLQA[OH]   |
|                | Peptide35  | [H]FLGPLLVLQAGFFLL[OH]   |
|                | Peptide36  | [H]LVLQAGFFLLTRILT[OH]   |
|                | Peptide37  | [H]GFFLLTRILTIPQSL[OH]   |
|                | Peptide38  | [H]TRILTIPQSLDSWWT[OH]   |
| Surface pool 3 | Peptide 39 | [H]IPQSLDSWWTSLNFL[OH]   |
|                | Peptide 40 | [H]DSWWTSLNFLGGTTV[OH]   |
|                | Peptide 41 | [H]SLNFLGGTTVCLGQN[OH]   |
|                | Peptide 42 | [H]GGTTVCLGQNSQSPT[OH]   |
|                | Peptide 43 | [H]CLGQNSQSPTS NHSP[OH]  |
|                | Peptide 44 | [H]SQSPTS NHSP TSCPP[OH] |
|                | Peptide 45 | [H]SNHSPTSCPPTCPGY[OH]   |
|                | Peptide 46 | [H]TSCPPTCPGYRWMCL[OH]   |
|                | Peptide 47 | [H]TCPGYRWMCLRRFI[OH]    |
|                | Peptide 48 | [H]RWMCLRRFIIFLIL[OH]    |
|                | Peptide 49 | [H]RRFIIFLIFLLCL[OH]     |
|                | Peptide 50 | [H]FLFILLCLIFLLVL[OH]    |
|                | Peptide 51 | [H]LLCLIFLLVLLDYQG[OH]   |
|                | Peptide 52 | [H]FLLVLLDYQGMPLVC[OH]   |
|                | Peptide 53 | [H]LDYQGMPLVCPLIPG[OH]   |
|                | Peptide 54 | [H]MLPVCPLIPGSSTTS[OH]   |
|                | Peptide 55 | [H]PLIPGSSTTSTGPCR[OH]   |
|                | Peptide 56 | [H]SSTTSTGPCRTCMTT[OH]   |
|                | Peptide 57 | [H]TGPCRTCMTTAQGTS[OH]   |
| Surface pool 4 | Peptide 58 | [H]TCMTTAQGTSMYPSC[OH]   |
|                | Peptide 59 | [H]AQGTSMYPSCCCTKP[OH]   |
|                | Peptide 60 | [H]MYPSCCCTKPSDGNC[OH]   |
|                | Peptide 61 | [H]CCTKPSDGNCTCIP[OH]    |
|                | Peptide 62 | [H]SDGNCTCIPSSWA[OH]     |
|                | Peptide 63 | [H]TCIPSSWAFGKFL[OH]     |
|                | Peptide 64 | [H]PSSWAFGKFLWEWAS[OH]   |
|                | Peptide 65 | [H]FGKFLWEWASARFSW[OH]   |
|                | Peptide 66 | [H]WEWASARFSWLSLLV[OH]   |
|                | Peptide 67 | [H]ARFSWLSLLVPFVQW[OH]   |
|                | Peptide 68 | [H]LSLLVPFVQWVGLS[OH]    |
|                | Peptide 69 | [H]PFVQWVGLSPTVWL[OH]    |
|                | Peptide 70 | [H]FVGLSPTVWLSVIWM[OH]   |
|                | Peptide 71 | [H]PTVWLSVIWMMWYWG[OH]   |
|                | Peptide 72 | [H]SVIWMMWYWGPSLYS[OH]   |

|  |            |                         |
|--|------------|-------------------------|
|  | Peptide 73 | [H]MWYWGPSLYSILSPF[OH]  |
|  | Peptide 74 | [H]PSLYSILSPFLPLLP[OH]  |
|  | Peptide 75 | [H]ILSPFLPLLPDIFFCL[OH] |
|  | Peptide 76 | [H]FLPLLPDIFFCLWVYI[OH] |

Polymerase antigen:

| Peptide pool      | Peptide number | Amino acid sequence    |
|-------------------|----------------|------------------------|
| Polymerase pool 1 | Peptide 1      | [H]MPLSYQHFRKLLLLD[OH] |
|                   | Peptide 2      | [H]QHFRKLLLLDDEAGP[OH] |
|                   | Peptide 3      | [H]LLLLDDEAGPLEEEL[OH] |
|                   | Peptide 4      | [H]DEAGPLEEELPRLAD[OH] |
|                   | Peptide 5      | [H]LEEELPRLADEGLNR[OH] |
|                   | Peptide 6      | [H]PRLADEGLNRRVAED[OH] |
|                   | Peptide 7      | [H]EGLNRRVAEDLNLGN[OH] |
|                   | Peptide 8      | [H]RVAEDLNLGNLNVSI[OH] |
|                   | Peptide 9      | [H]LNLGNLNVSIPTWK[OH]  |
|                   | Peptide 10     | [H]LNVSIPTWKVGNFT[OH]  |
|                   | Peptide 11     | [H]PTWKVGNFTGLYSS[OH]  |
|                   | Peptide 12     | [H]VGNFTGLYSSTVPVF[OH] |
|                   | Peptide 13     | [H]GLYSSTVPVFNPHWK[OH] |
|                   | Peptide 14     | [H]TVPVFNPHWKTPSFP[OH] |
|                   | Peptide 15     | [H]NPHWKTPSFPNIHLH[OH] |
|                   | Peptide 16     | [H]TPSFPNIHLHQDIK[OH]  |
|                   | Peptide 17     | [H]NIHLHQDIKKCEQF[OH]  |
|                   | Peptide 18     | [H]QDIKKCEQFVGPLT[OH]  |
|                   | Peptide 19     | [H]KCEQFVGPLTVNEKR[OH] |
|                   | Peptide 20     | [H]VGPLTVNEKRRLQLI[OH] |
| Polymerase pool 2 | Peptide 21     | [H]VNEKRRLQLIMPARF[OH] |
|                   | Peptide 22     | [H]RLQLIMPARFYPKVT[OH] |
|                   | Peptide 23     | [H]MPARFYPKVTKYLPL[OH] |
|                   | Peptide 24     | [H]YPKVTKYLPLDKGIK[OH] |
|                   | Peptide 25     | [H]KYLPLDKGIKPYYPE[OH] |
|                   | Peptide 26     | [H]DKGIKPYYPEHLVNH[OH] |
|                   | Peptide 27     | [H]PYYPEHLVNHYFQTR[OH] |
|                   | Peptide 28     | [H]HLVNHYFQTRHYLHT[OH] |
|                   | Peptide 29     | [H]YFQTRHYLHTLWKAG[OH] |
|                   | Peptide 30     | [H]HYLHTLWKAGILYKR[OH] |
|                   | Peptide 31     | [H]LWKAGILYKRETTHS[OH] |

|                   |            |                         |
|-------------------|------------|-------------------------|
|                   | Peptide 32 | [H]ILYKRETTTHSASFCG[OH] |
|                   | Peptide 33 | [H]ETTHSASFCGSPYSW[OH]  |
|                   | Peptide 34 | [H]ASFCGSPYSWEQDLQ[OH]  |
|                   | Peptide 35 | [H]SPYSWEQDLQHGAES[OH]  |
|                   | Peptide 36 | [H]EQDLQHGAESFHQQS[OH]  |
|                   | Peptide 37 | [H]HGAESFHQQSSGILS[OH]  |
|                   | Peptide 38 | [H]FHQQSSGILSRPPVG[OH]  |
|                   | Peptide 39 | [H]SGILSRPPVGSSSLQS[OH] |
|                   | Peptide 40 | [H]RPPVGSSSLQSKHKS[OH]  |
| Polymerase pool 3 | Peptide 41 | [H]SSLQSKHKSRLGLQ[OH]   |
|                   | Peptide 42 | [H]KHSKSRLGLQSQQGH[OH]  |
|                   | Peptide 43 | [H]RLGLQSQQGHARRQ[OH]   |
|                   | Peptide 44 | [H]SQQGHARRQQGRSW[OH]   |
|                   | Peptide 45 | [H]LARRQQGRSWSIRAG[OH]  |
|                   | Peptide 46 | [H]QGRSWSIRAGFHPTA[OH]  |
|                   | Peptide 47 | [H]SIRAGFHPTARRPFG[OH]  |
|                   | Peptide 48 | [H]FHPTARRPFGVEPSG[OH]  |
|                   | Peptide 49 | [H]RRPFGVEPSGSGHTT[OH]  |
|                   | Peptide 50 | [H]VEPSGSGHTTNFASK[OH]  |
|                   | Peptide 51 | [H]SGHTTNFASKSASCL[OH]  |
|                   | Peptide 52 | [H]NFASKSASCLHQSPD[OH]  |
|                   | Peptide 53 | [H]SASCLHQSPDRKAAY[OH]  |
|                   | Peptide 54 | [H]HQSPDRKAAYPAVST[OH]  |
|                   | Peptide 55 | [H]RKAAYPAVSTFEKHS[OH]  |
|                   | Peptide 56 | [H]PAVSTFEKHSSSGHA[OH]  |
|                   | Peptide 57 | [H]FEKHSSSGHAVEFHNL[OH] |
|                   | Peptide 58 | [H]SSGHAVEFHNLSPNS[OH]  |
|                   | Peptide 59 | [H]VEFHNLSPNSARSQS[OH]  |
|                   | Peptide 60 | [H]LSPNSARSQSERPVF[OH]  |
| Polymerase pool 4 | Peptide 61 | [H]ARSQSERPVFPCWWL[OH]  |
|                   | Peptide 62 | [H]ERPVFPCWWLQFRSS[OH]  |
|                   | Peptide 63 | [H]PCWWLQFRSSKPCSD[OH]  |
|                   | Peptide 64 | [H]QFRSSKPCSDYCLSL[OH]  |
|                   | Peptide 65 | [H]KPCSDYCLSLIVNLL[OH]  |
|                   | Peptide 66 | [H]YCLSLIVNLLEDWGP[OH]  |
|                   | Peptide 67 | [H]IVNLLEDWGPCAHEG[OH]  |
|                   | Peptide 68 | [H]EDWGPCAHEGEGHIR[OH]  |
|                   | Peptide 69 | [H]CAHEGEGHIRIPRTP[OH]  |
|                   | Peptide 70 | [H]EHHIRIPRTPSRVTG[OH]  |
|                   | Peptide 71 | [H]IPRTPSRVTGGVFLV[OH]  |
|                   | Peptide 72 | [H]SRVTGGVFLVDKNPH[OH]  |
|                   | Peptide 73 | [H]GVFLVDKNPHNTAES[OH]  |
|                   | Peptide 74 | [H]DKNPHNTAESRLVVD[OH]  |

|                   |             |                         |
|-------------------|-------------|-------------------------|
|                   | Peptide 75  | [H]NTAESRLVVDIFSQFS[OH] |
|                   | Peptide 76  | [H]RLVVDIFSQFSRGNYR[OH] |
|                   | Peptide 77  | [H]FSQFSRGNYRVSWPK[OH]  |
|                   | Peptide 78  | [H]RGNYRVSWPKFAVPN[OH]  |
|                   | Peptide 79  | [H]VSWPKFAVPNLQSLT[OH]  |
|                   | Peptide 80  | [H]FAVPNLQSLTNLLSS[OH]  |
|                   | Peptide 81  | [H]LQSLTNLLSSNLSWL[OH]  |
| Polymerase pool 5 | Peptide 82  | [H]NLLSSNLSWLSDVS[OH]   |
|                   | Peptide 83  | [H]NLSWLSDVSAAFYH[OH]   |
|                   | Peptide 84  | [H]SLDVSAAFYHLPLHP[OH]  |
|                   | Peptide 85  | [H]AAFYHLPLHPAAMP[OH]   |
|                   | Peptide 86  | [H]LPLHPAAMPHELLVGS[OH] |
|                   | Peptide 87  | [H]AAMPHELLVGSSGLSR[OH] |
|                   | Peptide 88  | [H]LLVGSSGLSRYVARL[OH]  |
|                   | Peptide 89  | [H]SGLSRYVARLSSNSR[OH]  |
|                   | Peptide 90  | [H]YVARLSSNSRILNHQ[OH]  |
|                   | Peptide 91  | [H]SSNSRILNHQHGTMP[OH]  |
|                   | Peptide 92  | [H]ILNHQHGTMPNLHDY[OH]  |
|                   | Peptide 93  | [H]HGTMPNLHDYCSRNL[OH]  |
|                   | Peptide 94  | [H]NLHDYCSRNLVVSLL[OH]  |
|                   | Peptide 95  | [H]CSRNLVVSLLLLYQT[OH]  |
|                   | Peptide 96  | [H]YVSLLLLYQTFGRKL[OH]  |
|                   | Peptide 97  | [H]LLYQTFGRKLHLYSH[OH]  |
|                   | Peptide 98  | [H]FGRKLHLYSHPIILG[OH]  |
|                   | Peptide 99  | [H]HLYSHPIILGFRKIP[OH]  |
|                   | Peptide 100 | [H]PIILGFRKIPMGVGL[OH]  |
|                   | Peptide 101 | [H]FRKIPMGVGLSPFLL[OH]  |
|                   | Peptide 102 | [H]MGVGLSPFLLAQFTS[OH]  |
| Polymerase pool 6 | Peptide 103 | [H]SPFLLAQFTSAICSV[OH]  |
|                   | Peptide 104 | [H]AQFTSAICSVVRRAF[OH]  |
|                   | Peptide 105 | [H]AICSVVRRAFPHCLA[OH]  |
|                   | Peptide 106 | [H]VRRAFPHCLAFSYMD[OH]  |
|                   | Peptide 107 | [H]PHCLAFSYMDDVVLG[OH]  |
|                   | Peptide 108 | [H]FSYMDDVVLGAKSVQ[OH]  |
|                   | Peptide 109 | [H]DVVLGAKSVQHLESL[OH]  |
|                   | Peptide 110 | [H]AKSVQHLESLFTAVT[OH]  |
|                   | Peptide 111 | [H]HLESLFTAVTNFLLS[OH]  |
|                   | Peptide 112 | [H]FTAVTNFLLSLGIHL[OH]  |
|                   | Peptide 113 | [H]NFLLSLGIHLNPNKT[OH]  |
|                   | Peptide 114 | [H]LGIHLNPNKTKRWGY[OH]  |
|                   | Peptide 115 | [H]NPNKTKRWGYSLNFM[OH]  |
|                   | Peptide 116 | [H]KRWGYSLNFMGYVIG[OH]  |
|                   | Peptide 117 | [H]SLNFMGYVIGSYGSL[OH]  |

|                   |             |                         |
|-------------------|-------------|-------------------------|
|                   | Peptide 118 | [H]GYVIGSYGSLPQEHII[OH] |
|                   | Peptide 119 | [H]SYGSLPQEHIIQKIK[OH]  |
|                   | Peptide 120 | [H]PQEHIIQKIKECFRK[OH]  |
|                   | Peptide 121 | [H]IQKIKECFRKLPINR[OH]  |
|                   | Peptide 122 | [H]ECFRKLPINRPIDWK[OH]  |
|                   | Peptide 123 | [H]LPINRPIDWKVCQRI[OH]  |
| Polymerase pool 7 | Peptide 124 | [H]PIDWKVCQRIVGLLG[OH]  |
|                   | Peptide 125 | [H]VCQRIVGLLGFAAPF[OH]  |
|                   | Peptide 126 | [H]VGLLGFAAPFTQCGY[OH]  |
|                   | Peptide 127 | [H]FAAPFTQCGYPALMP[OH]  |
|                   | Peptide 128 | [H]TQCGYPALMPLYACI[OH]  |
|                   | Peptide 129 | [H]PALMPLYACIQSKQA[OH]  |
|                   | Peptide 130 | [H]LYACIQSKQAFTFSP[OH]  |
|                   | Peptide 131 | [H]QSKQAFTFSPTYKAF[OH]  |
|                   | Peptide 132 | [H]FTFSPTYKAFLCKQY[OH]  |
|                   | Peptide 133 | [H]TYKAFLCKQYLNLYP[OH]  |
|                   | Peptide 134 | [H]LCKQYLNLYPVARQR[OH]  |
|                   | Peptide 135 | [H]LNLYPVARQRPGLCQ[OH]  |
|                   | Peptide 136 | [H]VARQRPGLCQVFADA[OH]  |
|                   | Peptide 137 | [H]PGLCQVFADATPTGW[OH]  |
|                   | Peptide 138 | [H]VFADATPTGWGLVMG[OH]  |
|                   | Peptide 139 | [H]TPTGWGLVMGHQVR[OH]   |
|                   | Peptide 140 | [H]GLVMGHQVRGTFSA[OH]   |
|                   | Peptide 141 | [H]HQRVRGTFSAPLPIH[OH]  |
|                   | Peptide 142 | [H]GTFSAPLPIHTAELL[OH]  |
|                   | Peptide 143 | [H]PLPIHTAELLAACFA[OH]  |
|                   | Peptide 144 | [H]TAELLAACFARSRSRG[OH] |
| Polymerase pool 8 | Peptide 145 | [H]AACFARSRSRGANIIG[OH] |
|                   | Peptide 146 | [H]RSRSGANIIGTDNSV[OH]  |
|                   | Peptide 147 | [H]JANIIGTDNSVLSRK[OH]  |
|                   | Peptide 148 | [H]TDNSVLSRKYSYP[OH]    |
|                   | Peptide 149 | [H]VLSRKYSYPWLLGC[OH]   |
|                   | Peptide 150 | [H]YTSYPWLLGCAANWI[OH]  |
|                   | Peptide 151 | [H]WLLGCAANWILRGTS[OH]  |
|                   | Peptide 152 | [H]AANWILRGTSFVYVP[OH]  |
|                   | Peptide 153 | [H]LRGTSFVYVPSALNP[OH]  |
|                   | Peptide 154 | [H]FVYVPSALNPADDPS[OH]  |
|                   | Peptide 155 | [H]SALNPADDPSRGRLG[OH]  |
|                   | Peptide 156 | [H]ADDPSRGRGLSRPL[OH]   |
|                   | Peptide 157 | [H]RGRGLSRPLRLPF[OH]    |
|                   | Peptide 158 | [H]LSRPLRLPFRPTTG[OH]   |
|                   | Peptide 159 | [H]LRLPFRPTTGRTSLY[OH]  |
|                   | Peptide 160 | [H]RPTTGRTSLYADSPS[OH]  |



|             |                         |
|-------------|-------------------------|
| Peptide 161 | [H]RTSLYADSPSVPSHL[OH]  |
| Peptide 162 | [H]ADSPSVPSHLPDRVH[OH]  |
| Peptide 163 | [H]VPSHLPDRVHVFASPL[OH] |
| Peptide 164 | [H]PDRVHVFASPLHVAWR[OH] |
| Peptide 165 | [H]RVHVFASPLHVAWRPP[OH] |

**Supplementary Table 2. Study cohort of HBeAg negative patients with chronic HBV infection divided based on therapy status.**

| Characteristics                   | Patients with chronic HBV infection (n=57) |                    |
|-----------------------------------|--------------------------------------------|--------------------|
|                                   | With therapy                               | Without therapy    |
| Number of patients                | 18                                         | 39                 |
| HBsAg (IU/mL): median (range)     | 1,195.5 (18-45634)                         | 1,710 (0.2-31,677) |
| HBcrAg (Log U/ml): median (range) | 3.0 (2.0-8.2)                              | 2.6 (2-7.3)        |
| Sex (male/female)                 | 12/6                                       | 22/17              |
| Age (years): median (range)       | 43 (22-60)                                 | 42 (18-72)         |
| ALT level (IU/L): median (range)  | 26 (15-58)                                 | 26 (13-194)        |
| HBV DNA <2,000 IU/mL (%)          | 83.3                                       | 76.9               |
| HBeAg (-/+/n.d.)                  | 16/0/2                                     | 38/0/1             |
| NA therapy yes/ no                | 18/0                                       | 0/39               |

**Supplementary Table 3. Study cohort of HBeAg negative patients with chronic HBV infection divided based on HBV DNA titer and ALT level.**

| Characteristics                   | Patients with chronic HBV infection (n=57) |                                        |                                                       |                                                       |
|-----------------------------------|--------------------------------------------|----------------------------------------|-------------------------------------------------------|-------------------------------------------------------|
|                                   | HBV DNA <2000 IU/mL & ALT level normal     | HBV DNA >2000 IU/mL & ALT level normal | HBV DNA <2000 IU/mL & ALT level upper limit of normal | HBV DNA >2000 IU/mL & ALT level upper limit of normal |
| Number of patients                | 36                                         | 7                                      | 9                                                     | 5                                                     |
| HBsAg (IU/mL): median (range)     | 595 (0.2-31,677)                           | 11,830 (39-45,634)                     | 1,301 (1-34,727)                                      | 6996 (1,590-20,941)                                   |
| HBcrAg (Log U/ml): median (range) | 2.6 (2-5.5)                                | 3.1 (2-8.2)                            | 2.8 (2-5.1)                                           | 5.7 (4.2-7.3)                                         |
| Sex (male/female)                 | 21/15                                      | 3/4                                    | 6/3                                                   | 4/1                                                   |
| Age (years): median (range)       | 42.5 (18-72)                               | 33 (18-46)                             | 35 (19-60)                                            | 49 (33-67)                                            |
| ALT level (IU/L): median (range)  | 23.5 (13-44)                               | 24 (19-40)                             | 54 (42-112)                                           | 128 (66-220)                                          |
| NA therapy yes/ no                | 12/24                                      | 2/5                                    | 3/6                                                   | 1/4                                                   |

## SUPPLEMENTARY FIGURE LEGENDS

### Supplementary figure S1. Overview of the study design.

Schematic representation of the study design for (A) phenotyping of total immune cells and functional study of HBV-specific T cell and (B) phenotyping and functional study of HBV core<sub>18</sub>- and HBV pol<sub>455</sub>-specific T cells of HLA-A\*02 positive, chronic hepatitis B infected patients. HBcrAg, hepatitis B core-related antigen; HBsAg, hepatitis B virus surface antigen; rhIL-2, recombinant human interleukin-2; pMHC I, peptide-loaded MHC I.

### Supplementary figure S2. Characterization of total T cells in CHB patients with different levels of HBsAg and HBcrAg.

(A) Gating strategies used to identify *ex vivo* CD4<sup>+</sup> and CD8<sup>+</sup> T cells and downstream analysis of activation and exhaustion phenotypes and T cell subsets based on CD45RA and CCR7 expression; naïve (CD45RA<sup>+</sup> CCR7<sup>+</sup>), T<sub>CM</sub>: central memory (CD45RA<sup>-</sup> CCR7<sup>+</sup>), T<sub>EM</sub>: effector memory (CD45RA<sup>-</sup> CCR7<sup>-</sup>), T<sub>EMRA</sub>: terminally differentiated effector memory (T<sub>EMRA</sub>; CD45RA<sup>+</sup> CCR7<sup>-</sup>). (B-C) Correlation of HBsAg level (B) and HBcrAg level (C) with CD4<sup>+</sup> and CD8<sup>+</sup> T cell subsets. (D) Frequencies of  $\gamma\delta$  T cells, MAIT cells and Treg cells in CHB patients with different levels of HBsAg or HBcrAg. Radar plot depicting the mean percentage of total T cell subsets from each group of patients with different levels of HBsAg or HBcrAg. Statistical significance between each two groups was tested by Mann-Whitney test for non-parametric data and by Unpaired t test for parametric data.

**Supplementary figure S3. Correlation analysis of HBsAg and HBcrAg with HBV-specific CD4<sup>+</sup> and CD8<sup>+</sup> T cell response.**

HBV-specific CD4<sup>+</sup> and CD8<sup>+</sup> T cell responses following 10-day *in vitro* stimulation with HBV OLP pools. (A-B) Correlation of HBsAg (A) and HBcrAg (B) with total, core-, surface-, and polymerase-specific T cell response. Total-specific T cell response: sum of all 14 OLP pools.

**Supplementary figure S4. Influence of NA therapy, HBV DNA titer and ALT level on HBV-specific CD4<sup>+</sup> and CD8<sup>+</sup> T cell responses in CHB patients.**

HBV-specific CD4<sup>+</sup> and CD8<sup>+</sup> T cell responses following 10-day *in vitro* stimulation with HBV OLP pools. (A) Expression of IFN- $\gamma$  by HBV-specific CD4<sup>+</sup> and CD8<sup>+</sup> T cells from NA treated (n=18) and untreated (n=39) CHB patients. (B) Comparison of IFN- $\gamma$  expressing HBV-specific T cells in different stages of disease grouped according to HBV DNA titer and ALT levels. Statistical significance was tested by Mann-Whitney test for non-parametric data and by Unpaired t test for parametric data.

**Supplementary figure S5. Correlation analyses of age with HBsAg and HBcrAg as well as CD4<sup>+</sup> and CD8<sup>+</sup> T cell subsets.**

(A) Correlation analyses of the age and quantities of HBsAg and HBcrAg. (B) Correlation analyses of the age and frequencies of CD4<sup>+</sup> and CD8<sup>+</sup> T cell subsets.
